# Supplementary material for: Systematic Review and Meta-analysis of Interventions for Depression and Anxiety in Persons With Rheumatoid Arthritis
Source: PubMed Central journal article supplement — J Clin Rheumatol. 2017 Feb 17;23(8):425–34. doi: 10.1097/RHU.0000000000000489 (PMC5704737; doi:10.1097/rhu.0000000000000489), 2017-02-17
Supplement: rhu-23-425-s001.pdf [file rhu-23-425-s001.pdf]

## EMBASE

1. rheumatoid arthritis/
2. adult onset still disease/ or felty syndrome/ or rheumatoid nodule/
3. (rheumatoid adj2 (arthritis or nodule? or vasculitis)).ti,ab.
4. ((caplan? or felty?) adj syndrome?).ti,ab.
5. or/1-4 [RA]
6. major depression/ or recurrent brief depression/ or \*treatment resistant depression/
7. \*dysthymia/ or \*DYSPHORIA/
8. \*reactive depression/ or \*endogenous depression/
9. depressive.ti,ab. or depression.ti. or depressed.ti.
10. treatment resistant depress\$.ab.
11. dysthym\$.ti,ab.
12. dysphori\$.ti,ab.
13. melancholia\$.ti,ab.
14. depress\$ disorder?.ti,ab.
15. major depress\$.ab.
16. (recurr\$ depress\$ or chronic depress\$.ab.
17. (anxiety adj2 depress\$.ab.
18. anxiety disorder/ or "mixed anxiety and depression"/ or generalized anxiety disorder/
19. anxiety disorder?.ti,ab.
20. (chronic\$ adj2 (anxious\$ or anxie\$)).ti,ab.
21. \*acute stress disorder/
22. ((mood or mental or anxiety) adj2 (disorder? or illness?) adj9 (detect\$ or diagnose? or diagnos?s or identif\$ or treat\$ or underdiagnos\$ or under diagnos\$)).ti,ab.
23. or/6-22 [Depression/Anxiety Disorders]
24. \*mood disorder/
25. \*panic/
26. \*posttraumatic stress disorder/
27. Phobic disorders/
28. \*obsessive compulsive disorder/
29. ((mood or phobic or stress) adj2 disorder?).ti,ab.
30. or/24-29 [Other Psych Disorders]
31. 5 and 23 [RA & Depression/Anxiety]
32. (5 and 30) not 31 [RA & Other Psych Disorders]
33. (systematic review or metanalysis\$ or meta-analys\$ or overview or synthesis).ti.
34. "systematic review"/
35. meta analysis/
36. or/33-35 [Systematic Review Filter]
37. controlled clinical trial/ or controlled study/ or randomized controlled trial/ [EM]
38. randomi?ed.ti. or ((random\$ or control) adj3 (group? or cohort? or patient? or hospital\$ or department?)).ab. or (controlled adj2 (study or trial)).ti.
39. (multicenter and (study or trial)).ti.
40. (random sampl\$ or random digit\$ or random effect\$ or random survey or random regression).ti,ab. not randomized controlled trial/ [Per BMJ Clinical Evidence Filter]
41. (exp animals/ or exp invertebrate/ or animal experiment/ or animal model/ or animal tissue/ or animal cell/ or nonhuman/) and (human/ or normal human/ or human cell/)
42. (exp animals/ or exp invertebrate/ or animal experiment/ or animal model/ or animal tissue/ or animal cell/ or nonhuman/) not 41
43. (or/37-39) not (or/40,42) [RCT Filter for EMBASE]
44. (31 or 32) and 36 [RA Systematic reviews to export]
45. ((31 or 32) and 43) not 44 [RA Trials to export]
46. limit 44 to em=201436-201509
47. limit 45 to em=201436-201509

## Medline

1. Arthritis, Rheumatoid/
2. caplan syndrome/ or felty syndrome/ or rheumatoid nodule/
3. (rheumatoid adj2 (arthritis or nodule? or vasculitis)).ti,ab.
4. ((caplan? or felty?) adj syndrome?).ti,ab.
5. or/1-4 [RA]
6. Depressive Disorder/ or Depressive Disorder, Major/ or depressive disorder, treatment resistant/
7. dysthymic disorder/
8. depressive.ti,ab. or depression.ti. or depressed.ti.
9. treatment resistant depress\$.ab.
10. dysthym\$.ti,ab.
11. dysphori\$.ti,ab.
12. melancholia\$.ti,ab.
13. depress\$ disorder?.ti,ab.
14. major depress\$.ab.
15. (recurr\$ depress\$ or chronic depress\$.ab.
16. (anxiety adj2 depress\$.ab.
17. anxiety disorders/
18. anxiety disorder?.ti,ab.
19. (chronic\$ adj2 (anxious\$ or anxie\$)).ti,ab.
20. Stress, psychological/di, pc or (stress, psychological/ and (diagnose? or diagnos?s or underdiagnos\$ or under diagnos\$).ti.)
21. ((mood or mental or anxiety) adj2 (disorder? or illness?) adj9 (detect\$ or diagnose? or diagnos?s or identif\$ or treat\$ or underdiagnos\$ or under diagnos\$)).ti,ab.
22. or/6-21 [Depression/Anxiety Disorders]
23. \*Mental disorders/
24. mood disorders/
25. panic disorder/
26. stress disorders, traumatic/ or stress disorders, post-traumatic/
27. Phobic disorders/
28. obsessive-compulsive disorder/
29. ((mood or phobic or stress) adj2 disorder?).ti,ab.
30. or/23-29 [Other Psych Disorders]
31. 5 and 22 [RA & Depression/Anxiety]
32. (5 and 30) not 31 [RA & Other Psych Disorders]
33. (randomized controlled trial or controlled clinical trial).pt. or randomized.ab. or placebo.ab. or clinical trials as topic.sh. or randomly.ab. or trial.ti.
34. exp animals/ not humans.sh.
35. 33 not 34
36. (systematic review or metanalysis\$ or meta-analys\$ or overview or synthesis).ti.
37. review.pt. and (medline or pubmed or embase or cochrane).ab.
38. (medline or systematic review).tw. or meta-analysis.pt. or intervention.ti.
39. (31 or 32) and (36 or 37 or 38) [RA Systematic reviews to export]
40. ((31 or 32) and 35) not 39 [RA Trials]
41. limit 39 to ed=20140901-20150301
42. limit 40 to ed=20140901-20150301

## Psycarticles

1. (rheumatoid adj2 (arthritis or nodule? or vasculitis)).ti,ab.
2. ((caplan? or felty?) adj syndrome?).ti,ab.
3. 1 or 2 [RA]
4. randomi?ed.ti. or ((random\$ or control) adj3 (group? or cohort? or patient? or hospital\$ or department?)).ab. or (controlled adj2 (study or trial)).ti.
5. (multicenter and (study or trial)).ti.
6. ((systematic adj2 review) or overview or metaanalys\$ or meta-analys\$).ti.
7. 4 or 5 [Trials]
8. (3 and 7) not 6

## PsycInfo-ProQuest

1. Rheumatoid arthritis/
2. AB, TI(arthritis NEAR/2 (rheumatoid or nodule? or vasculitis))
3. S1 or S2 [RA]
4. Depressive Disorder/ or Depressive Disorder, Major/ or Dysthymic Disorder/ or Seasonal Affective Disorder/
5. Depression/ or Anxiety/ [Behavioural Symptoms/Emotions]
6. anxiety disorders/ OR exp obsessive-compulsive disorder/ OR panic disorder/ OR phobic disorders/ OR traumatic stress disorders/ OR posttraumatic stress disorders/
7. AB, TI(depression or depressive or anxiety)
8. AB(depression)
9. AB(depressive)
10. AB(anxiety)
11. S4 or S5 or S6 or S7 or S8 or S9 or S10 [Depression or Anxiety]
12. Mental health/
13. AB, TI((emotional or mental or psychological) NEAR/2 (well-being or health))
14. AB, TI((mental NEAR/2 (health or distress)) or psychological distress)
15. TI(coping or cope)
16. AB(coping NEAR/2 (behavio?r? or mechanism? or strateg\* or pattern?))
17. S12 or S13 or S14 or S15 or S16 [Mental/emotional health\*]
18. Mood disorders/
19. AB, TI(mood disorder?)
20. S18 or S19 [Mood Disorders]
21. Psychological stress/
22. AB, TI(stress NEAR/2 (mental or psychological or long-term or chronic or ongoing))
23. AB, TI(stressful or stressor?)
24. S21 or S22 or S23 [Stress psychological]
25. Physiological stress/
26. AB, TI(psychophysical)
27. S25 or S26 [Stress, physiological]
28. S3 and S11 [RA & Depression]
29. (S3 and S17) not S28 [RA & Mental Health]
30. (S3 and S20) not (S28 or S29) [RA & Mood Disorders]
31. (S3 and S24) not (S28 or S29 or S30) [RA & Mental Stress]
32. AB, TI("double-blind" or "random\* assigned" or control)
33. (S28 or S29 or S30 or S31) and S32

## SCOPUS

ABS (arthritis W/2 (rheumatoid or nodule? or vasculitis))

TITLE (arthritis W/2 (rheumatoid or nodule? or vasculitis))

#1 or #2 [RA]

Depressive Disorder/ or Depressive Disorder, Major/ or Dysthymic Disorder/ or Seasonal Affective Disorder/

Depression/ or Anxiety/ [Behavioural Symptoms/Emotions]

anxiety disorders/ OR obsessive-compulsive disorder/ OR panic disorder/ OR phobic disorders/ OR traumatic stress disorders/ OR posttraumatic stress disorders/

TITLE(depression or depressive or anxiety)

ABS (depression or depressive or anxiety)

#4 or #5 or #6 or #7 or #8 [Depression or Anxiety]

Mental health/

TITLE((emotional or mental or psychological) W/2 (well-being or health))

ABS ((emotional or mental or psychological) W/2 (well-being or health))

TITLE ((mental W/2 (health or distress)) or {psychological distress})

ABS ((mental W/2 (health or distress)) or {psychological distress})

TITLE(coping or cope)

ABS(coping W/2 (behavior? or mechanism? or strateg\* or pattern?))

#10 or #11 or #12 or #13 or #14 or #15 or #16 [Mental/emotional health\*]

Mood disorders/

TITLE {mood disorder}

ABS {mood disorder}

#18 or #19 or #20 [Mood Disorders]

Psychological stress/

TITLE (stress W/2 (mental or psychological or long-term or chronic or ongoing))

ABS (stress W/2 (mental or psychological or long-term or chronic or ongoing))

TITLE (stressful or stressor?)

ABS (stressful or stressor?)

#22 or #23 or #24 or #25 or #26 [Stress psychological]

#3 and #9 [RA & Depression]

(#3 and #17) and not #28 [RA & Mental Health]

(#3 and #21) and not (#28 or #29) [RA & Mood Disorders]

(#3 and #27) and not (#28 or #29 or #30) [RA & Mental Stress]

TITLE ("double-blind" or "random\* assigned" or control)

ABS ("double-blind" or "random\* assigned" or control)

(#28 or #29 or #30 or #31) and (#32 or #33)

#34 and SUBJAREA(mult or neur or phar or medi or nurs or heal or psyc)

## Web of Science

TS=(rheumatoid arthritis)

TI= (rheumatoid arthritis)

TS=(depress\* OR anxiety)

TI=(depress\* OR anxiety)

TS=(major depress\* disorder)

TI=(major depress\* disorder)

TS=(dysthymi\*)

TI=(dysthymi\*)

TS=(major depress\*)

TI=(major depress\*)

TS=(seasonal affective disorder)

TI=(seasonal affective disorder)

TS=(obsessive compulsive disorder)

TI=(obsessive compulsive disorder)

TS=(panic disorder)

TI=(panic disorder)

TS=(phobi\*)

TI=(phobi\*)

TI=(posttraumatic stress)

TS=(posttraumatic stress)

TS=(mood disorder\*)

TI=(mood disorder\*)
